1 **Millipede genomes reveal unique adaptation of genes and microRNAs during myriapod**  
2 **evolution**

3

4 Zhe Qu<sup>1,^</sup>, Wenyan Nong<sup>1,^</sup>, Wai Lok So<sup>1,^</sup>, Tom Barton-Owen<sup>1,^</sup>, Yiqian Li<sup>1,^</sup>, Chade Li<sup>1</sup>,  
5 Thomas C.N. Leung<sup>2</sup>, Tobias Baril<sup>3</sup>, Annette Y.P. Wong<sup>1</sup>, Thomas Swale<sup>4</sup>, Ting-Fung Chan<sup>2</sup>,  
6 Alexander Hayward<sup>3</sup>, Sai-Ming Ngai<sup>2</sup>, Jerome H.L. Hui<sup>1,\*</sup>

7

8 1. School of Life Sciences, Simon F.S. Li Marine Science Laboratory, State Key Laboratory  
9 of Agrobiotechnology, The Chinese University of Hong Kong, Hong Kong

10

11 2. School of Life Sciences, State Key Laboratory of Agrobiotechnology, The Chinese  
12 University of Hong Kong, Hong Kong

13

14 3. Department of Conservation and Ecology, Penryn Campus, University of Exeter, United  
15 Kingdom

16

17 4. Dovetail Genomics, United States of America

18

19

20 ^ = contributed equally,

21 \* = corresponding author, [jeromehui@cuhk.edu.hk](mailto:jeromehui@cuhk.edu.hk)

22

23

24

25

26

27

28

29

30

31

32

33

34

## 35 **Abstract**

36 The Myriapoda including millipedes and centipedes is of major importance in terrestrial  
37 ecology and nutrient recycling. Here, we sequenced and assembled two chromosomal-scale  
38 genomes of millipedes *Helicorthomorpha holstii* (182 Mb, N50 18.11 Mb mainly on 8  
39 pseudomolecules) and *Trigoniulus corallinus* (449 Mb, N50 26.78 Mb mainly on 15  
40 pseudomolecules). Unique defense systems, genomic features, and patterns of gene  
41 regulation in millipedes, not observed in other arthropods, are revealed. Millipedes possesses  
42 a unique ozadene defensive gland unlike the venomous forcipules in centipedes. Sets of genes  
43 associated with anti-microbial activity are identified with proteomics, suggesting that the  
44 ozadene gland is not primarily an antipredator adaptation (at least in *T. corallinus*). Macro-  
45 synteny analyses revealed highly conserved genomic blocks between centipede and the two  
46 millipedes. Tight Hox and the first loose ecdysozoan ParaHox homeobox clusters are  
47 identified, and a myriapod-specific genomic rearrangement including Hox3 is also observed.  
48 The Argonaute proteins for loading small RNAs are duplicated in both millipedes, but unlike  
49 insects, an argonaute duplicate has become a pseudogene. Evidence of post-transcriptional  
50 modification in small RNAs, including species-specific microRNA arm switching that  
51 provide differential gene regulation is also obtained. Millipede genomes reveal a series of  
52 unique genomic adaptations and microRNA regulation mechanisms have occurred in this  
53 major lineage of arthropod diversity. Collectively, the two millipede genomes shed new light  
54 on this fascinating but poorly understood branch of life, with a highly unusual body plan and  
55 novel adaptations to their environment.

56

## 57 **Introduction**

58 Arthropoda comprises the myriapods (millipedes and centipedes), crustaceans  
59 (shrimps, crabs, and lobsters), chelicerates (spiders, scorpions, and horseshoe crab), and  
60 insects. Collectively, these taxa account for the majority of described terrestrial and aquatic  
61 animal species (Figure 1A). While crustaceans, chelicerates, and insects have been the focus  
62 of intense research, the myriapods are comparatively less well studied, despite their great  
63 diversity and important ecological roles. In particular, arthropod genomic and transcriptomic  
64 information is highly uneven, with a heavy bias towards the crustaceans, chelicerates, and  
65 insects (Pisani et al 2013; Richards 2019). Yet, myriapods display many interesting biological  
66 characteristics, including a multi-segmented trunk supported by an unusually large number of  
67 legs. Centipede is Latin for ‘100 feet’, but centipedes actually have between 30 and 354 legs  
68 and no species has exactly 100 legs (Arthur and Chipman 2005). In contrast, millipede is

69 Latin for ‘1000 feet’, and while millipedes include the ‘leggiest’ animal on Earth, no species  
70 has as many as 1000 legs, with the true number varying between 22 and 750 (Marek et al  
71 2012). Myriapods were among the first arthropods to invade the land from the sea, during an  
72 independent terrestrialisation from early arachnids and insects, which occurred during the  
73 Silurian period ~400 million years ago (Minelli 2015). Today, the Myriapoda consists of  
74 ~16,000 species, all of which are terrestrial (Kenning et al 2017). Currently, just two  
75 myriapod genomes are available: the centipede *Strigamia maritima* (Chipman et al 2014),  
76 and a draft genome of the millipede *Trigoniulus corallinus* (Kenny et al 2015). Consequently,  
77 the myriapods, and particularly the millipedes, present an excellent opportunity to improve  
78 understanding of arthropod evolution and genomics.

79

80 Millipedes compose the class Diplopoda, a highly diverse group containing more than  
81 12,000 described species, and the third largest class of terrestrial arthropods after insects and  
82 arachnids (Adis 2002). Millipedes are highly important components of terrestrial ecosystems,  
83 especially with reference to their roles in the breakdown of organic plant materials and  
84 nutrient recycling. In contrast to centipedes which have one pair of legs per body segment,  
85 individual body segments are fused in pairs in millipedes, resulting in a series of double-  
86 legged segments. The typical millipede body plan consists of the head, collum, and trunk  
87 (with varying numbers of diplo-segments). The primary defense mechanism of millipedes is  
88 to curl into a coil, while a unique secondary defense system in some species involves emitting  
89 toxic liquids or gases from the ozadene gland, via ozopores located on each side of the  
90 metazonite (the posterior portion of diplosegment)(Enghoff 1993).

91

92 The polydesmid millipede *Helicorthomorpha holstii* (Polydesmida) and the rusty  
93 millipede *Trigoniulus corallinus* (Spirobolida) were chosen in this study to represent two  
94 major lineages from the 16 millipede orders. Both species originate in Asia and are now  
95 cosmopolitan species. *H. holstii* undergoes development with fixed numbers of legs and  
96 segments that increase in every stadium after each molt, and will complete seven juvenile  
97 stadia before reaching sexual maturity at stadium VIII (adult) (Figure 1B). Conversely, *T.*  
98 *corallinus* undergoes development with variable numbers of new segments and legs added in  
99 the initial molts, with no further segments developing after reaching stadium X (adult)(Figure  
100 1C).

101

102 Here we present two high-quality *de novo* reference genomes close to the  
103 chromosomal-assembly level, for the Asian polydesmid millipede *H. holstii* and the  
104 spirobolid rusty millipede *T. corallinus* (Table 1). With reference to these genomes, we reveal  
105 the basis of a unique defence system, genomic features, and gene regulation in millipedes, not  
106 observed in other arthropods. The genomic resources we develop expand the known gene  
107 repertoire of myriapods and provide a genetic toolkit for further understanding of their unique  
108 adaptations and evolutionary pathways.

109

## 110 **Results and Discussion**

### 111 **High quality genomes of two millipedes**

112 Genomic DNA was extracted from single individuals of two species of millipedes,  
113 including polydesmid millipede *H. holstii* (Figure 1B) and the rusty millipede *T. corallinus*  
114 (Figure 1C), and sequenced using the Illumina short-read and 10X Genomics linked-read  
115 sequencing platforms (Supplementary information S1, Table 1.1.1-1.1.2). Hi-C libraries were  
116 also constructed for both species and sequenced on the Illumina platform (Supplementary  
117 information S1, Figure S1.1.1-1.1.2). Both genomes were first assembled using short-reads,  
118 followed by scaffolding with Hi-C data. The *H. holstii* genome assembly is 182 Mb with a  
119 scaffold N50 of 18.11 Mb (Table 1). This high physical contiguity is matched by high  
120 completeness, with a 97.2 % complete BUSCO score for eukaryotic genes (Table 1). The *T.*  
121 *corallinus* genome is 449 Mb with a scaffold N50 of 26.7 Mb, 96.7 % BUSCO completeness,  
122 (Table 1). 23,013 and 21,361 gene models were predicted for the *H. holstii* and *T. corallinus*  
123 genome assemblies, respectively (Table 1). Majority of the sequences assembled for the *H.*  
124 *holstii* and *T. corallinus* genomes are contained on 8 and 17 pseudomolecules respectively  
125 (Supplementary information S1, Figure S1.1.1-1.1.2), representing the first close to  
126 chromosomal-level genomes for myriapods.

127

### 128 **Ozadene defensive gland**

129 Many millipedes possess ozadenes, specialised glands that contain chemicals such as  
130 alkaloids, quinones, phenols, or cyanogenic compounds used in defence against predators.  
131 The structure of the julid-type gland in *T. corallinus* consists of sacs bordered by secretory  
132 cells lined with cuticle, and an efferent duct opening laterally on the body surface via a small  
133 ozopore (Figure 1D). Discharge of defensive compounds is accomplished by contraction of  
134 valvular muscle and simultaneous compression of the sac. 2,652 peptides were identified in  
135 the *T. corallinus* ozadene gland by mass spectrometry. Despite a vast number of peptides

136 being identified, only 7 of them were predicted as P1 toxins (i.e. with low confidence, Figure  
137 1E, Supplementary information S1, Figure S1.3.1, Table 1.3.3, Supplementary information  
138 S3). These data suggest that the millipede ozadene gland (at least for *T. corallinus*), is not  
139 adapted to produce toxins, unlike the venomous forcipules present in centipedes.

140

141 The question then becomes, what is the function of the millipede ozadene gland?  
142 Gene ontology and KEGG pathway analyses of the remaining 2,645 non-toxin peptides were  
143 performed (Supplementary information S1, Table 1.3.4, and S4), and identified a total of  
144 1,051 proteins involved in antibacterial, antifungal, and antiviral biosynthesis (Figure 1F,  
145 Supplementary information S1, Figure S1.3.2, and S4). These data and analyses suggest one  
146 of the main functions of millipede ozadene (at least in *T. corallinus*), is to provide defence  
147 against pathogenic microorganisms rather than being primarily an antipredator adaptation.

148

#### 149 **Conserved synteny between myriapod genomes**

150 A major reason for the broad significance of millipede genomic resources is that  
151 myriapods serve as the outgroup to the Insecta, which is the largest group of described animal  
152 species. Thus, comparisons between millipedes and insects allow us to address a major  
153 outstanding question in animal evolution, specifically, how differential regulation of gene  
154 function facilitated the evolution of greatly divergent body plan morphologies.

155

156 Conservation of large-scale gene linkage has been previously detected between the  
157 centipede *Strigamia maritima* and the amphioxus *Branchiostoma floridae* at a higher level  
158 than with any insect, proving evidence that the last common ancestor of arthropods retained  
159 significant synteny with the last common ancestor of bilaterians (Chipman et al 2014). To  
160 understand the genomic rearrangement patterns among and between the diplopods and  
161 chilopods, conserved synteny analyses between the two millipedes and the centipede *S.*  
162 *maritima* were performed. As expected, higher conserved synteny blocks can be detected  
163 between the two millipedes than between millipede and the centipede (Figure 2). A higher  
164 level of large-scale gene linkage is also observed between *T. corallinus* and *S. strigamia* than  
165 between *H. holstii* and *S. maritima* (Figure 2). To further shed light on the situation, we have  
166 also compared the syntenic relationships between the three myriapod genomes to that of the  
167 human, and found that both millipede genomes share more syntenic blocks with human than  
168 human genome with the centipede genome (Figure 2).

169

## 170 **Millipede homeobox gene and cluster**

171 Homeobox genes are an ideal candidate to study body plan evolution, as they are  
172 conserved gene expression regulators in animals. We first systematically compared the  
173 homeobox gene content of all available insect genomes to the three myriapod genomes  
174 (Supplementary information S1, Figure S1.3.4). Given the varying genome quality of the  
175 insects being compared, we adopted a conservative approach by only confidently scoring  
176 gene gains, rather than gene losses, using the rationale of revealing the presence of  
177 orthologous homeobox genes in closely related lineages. The three myriapod genomes have  
178 undergone 3 lineage-specific duplications of common homeobox genes (Otx, Barhl, Irx),  
179 suggesting their suitability for making a comparison to the insects (Supplementary  
180 information S1, Figure S1.3.4).

181

182 Hox gene clusters are renowned for their role in the developmental patterning of the  
183 anteroposterior axis of animals. In both *H. holstii* and *T. corallinus* genomes, intact Hox  
184 clusters containing orthologues of most arthropod Hox genes are recovered except Hox3 gene,  
185 and are expressed in early developmental stages (Figure 3, Supplementary information S1,  
186 Figure S1.3.3, S1.3.6, S1.3.7). In the *H. holstii* genome, no Hox3 orthologues could be  
187 identified, and two Hox3 genes were located together on a different scaffold to the Hox  
188 cluster scaffold in *T. corallinus*. This situation mirrors that in the centipede *S. maritima*  
189 (Chipman et al 2014). Based on our phylogenetic analyses (Supplementary information S5  
190 and S6), we suggest that the genomic “relaxation” of Hox3 from the intact tight Hox clusters  
191 may have occurred in the ancestor of all myriapods (Figure 3).

192

193 Similar to the situation in *S. maritima*, Eve orthologue is closely linked to the Hox  
194 clusters in both millipede genomes. In addition, we have also discovered the linkage of other  
195 ANTP-class homeobox gene members to the Hox-Eve in the millipede genomes, including  
196 Abox, Exex, Dll, Nedx, En, Unpg, Ro, Btn (Supplementary information S1, Figure S1.3.5,  
197 S1.3.8). Whether this represents a difference in genome quality between the two millipede  
198 genomes (N50 = 26.7 Mb and 18.1 Mb) and the centipede genome (Chipman et al 2014, N50  
199 = 139kb), or a true genomic content difference between these myriapod lineages, remains to  
200 be tested through improvements to centipede genomic resources.

201

202 The ParaHox cluster is the paralogous sister of the Hox cluster, and contains an array  
203 of three ANTP-class homeobox genes: Gsx/ind, Xlox/Pdx, and Cdx/cad together patterning

204 the brain and endoderm formation in bilaterians (Brooke et al 1998). In general, the genomic  
205 linkage of ParaHox cluster genes has been lost in all investigated ecdysozoans (Hui et al  
206 2009). A loosely linked ParaHox cluster of Gsx and Cdx is found in the millipede *T.*  
207 *corallinus*, representing the first ecdysozoan ParaHox cluster (Figure 3). The ParaHox genes  
208 are expressed mainly during early development, and Gsx is also expressed during late  
209 developmental stage (Supplementary information S1, Figure S1.3.7). Given ParaHox  
210 clustering has been identified in the lophotrochozoans and deuterostomes (Brooke et al 1998;  
211 Hui et al 2009), our data here provide evidence that the arthropod and ecdysozoan ancestors  
212 contained clustering of ParaHox genes rather than having disintegrated ParaHox cluster as  
213 previously thought.

214

215 Other homeobox gene clusters are also identified and compared, including the NK  
216 cluster and the Irx cluster (Supplementary information S1, Figure S1.3.6, S1.3.8).  
217 Collectively, these examples highlight the importance of the novel genomic resources  
218 presented here, to: 1) reconstruct the arthropod ancestral situation, providing different  
219 interpretations given lineage-specific modifications, and, 2) understand the functional  
220 constraints in extant lineages, such as the relaxation in Hox3 and Xlox in the ecdysozoan Hox  
221 and ParaHox clusters.

222

### 223 **Transposable elements**

224 Transposable elements (TEs) are almost ubiquitous components of eukaryotic  
225 genomes, often accounting for a large proportion of an organism's genome (Chénais et al  
226 2012). Among the metazoans, the phylum Arthropoda is a particular focus for TE research.  
227 However, Myriapoda are the only major branch of Arthropoda for which knowledge of TEs  
228 remains extremely poor. Here, we examined the repeat content of one centipede and two  
229 millipede genomes to perform the first comparative investigation of TEs in the Myriapoda.  
230 As for other major arthropod groups (Petersen et al 2019), we find considerable variation in  
231 the total genomic contribution and composition of TEs among myriapod genomes.

232

233 TEs comprise 19-47% of assembled genomic content among the three available  
234 myriapod genomes, with total repeat content varying between 19-55% (Figure 4: Repeat  
235 Content; Supplementary information S1, Table 1.3.2). In the spirobolid millipede *T.*  
236 *corallinus*, repeats account for more than half of the assembled genome (55%, Supplementary  
237 information S2), which is of interest since the genome of *T. corallinus* is more than double

238 the length of either of the other two myriapod genomes (Figure 4: Repeat Content),  
239 suggesting that TEs have played a role in genome size evolution in this species. In contrast,  
240 repeat content is 40% in the geophilomorph centipede *S. maritima*, and just 19% in the  
241 polydesmid millipede *H. holstii*, demonstrating considerable variation among lineages (55%,  
242 Supplementary information S2). It is unclear what mechanisms are responsible for generating  
243 this variation, however, similar levels of variability in TE content are typical among species  
244 in other invertebrate genomes.

245

246 The main repeat types identified differ considerably among the available myriapod  
247 genomes. Complex retrotransposons, particularly *copia*-like and *gypsy*-like long-terminal  
248 repeat (LTR) TEs are the dominant TE class present in the genome of the centipede *S.*  
249 *maritima*, while Maverick DNA TEs are also dominant in the genome of the millipede *H.*  
250 *holstii* (Supplementary information S2). Meanwhile, a more cosmopolitan set of TEs are  
251 identified in the genome of *T. corallinus*, including SINEs, LINEs, DNA TEs and *gypsy*-like  
252 LTR TEs (Supplementary information S2).

253

254 TE sequences are distributed evenly across genic and intergenic regions in both  
255 millipede genomes (Figure 4: Repeat Locality). The frequent annotation of TEs in close  
256 proximity to genes raises the possibility that TEs may have played a particular role in host  
257 evolution in millipedes, since TEs are well known contributors of genomic novelty to host  
258 genomes (e.g. Feschotte 2008; Kidwell and Lisch 2000; Schrader and Schmitz 2019).  
259 Strikingly, in comparison TEs are largely excluded from genic neighbourhoods in the  
260 centipede genome (Figure 4: Repeat Locality). These patterns suggest that millipedes may be  
261 a particularly fertile group for future studies on host-TE interactions.

262

263 Analyses of sequence divergence among annotated TEs suggest that all three  
264 myriapod genomes have experienced recent spikes in TE activity, however, the specific  
265 pattern of activity difference among species (Figure 4: Repeat Landscapes). Strikingly, there  
266 is evidence of a particularly large and recent expansion of LTR TEs in the centipede *S.*  
267 *maritima*, but very limited evidence for activity prior to this, suggesting a recent invasion of  
268 the genome by *copia* and *gypsy* LTR TEs (Figure 4: Repeat Landscapes). In the millipede *H.*  
269 *holstii*, there is evidence of a much more modest recent expansion of both LTR TEs and  
270 DNA TEs, while there is evidence of a more prolonged expansion including SINEs, LINEs,



271 and DNA TEs, but very little LTR TE activity, in the millipede *T. corallinus* (Figure 4:  
272 Repeat Landscapes).

273

274 Taken together, our findings suggest that TEs have played a significant role in the  
275 shaping of myriapod genomes, implying that myriapods represent a rich group for future  
276 studies on host-TE interactions.

277

### 278 **Specific duplication of argonaute protein**

279 Another ideal candidate to understand how animals evolve are the small RNAs and  
280 their associated machineries. Small RNAs are also conserved gene expression regulators in  
281 animals, and their study will reveal hidden layers of gene regulation. For instance, the well-  
282 known mature microRNAs are 21-23 nucleotide non-coding RNAs that regulate gene  
283 expression and translation, usually by binding onto the 3' UTRs of target mRNAs to achieve  
284 post-transcriptional inhibition, either by suppressing translation or inducing mRNA  
285 degradation (Cao et al 2017; Qu et al 2018; Figure 5A). Despite the finding that the  
286 biogenesis pathways of microRNAs and other small RNAs are relatively conserved in  
287 animals, modifications of the small RNA machineries have been found to alter small RNA  
288 regulation and thus contribute to rewiring of genetic networks. For instance, the placozoan  
289 *Trichoplax adhaerens* has lost Piwi, Pasha, and Hen1 genes from its genome, where no  
290 microRNA is found to be produced (Grimson et al 2008).

291

292 In the two millipede genomes generated here, all genes responsible for small RNA  
293 machinery were identified, along with an unusual duplication of the Argonaute (Ago) gene,  
294 while the other biogenesis components remain the same (Figure 5A, supplementary  
295 information S1, Figure S1.3.9-1.3.11). In insects, it is well known that there are also two Ago  
296 forms, and for instance, in the fly *Drosophila melanogaster*, the dominant arm of the  
297 precursor microRNA can be sorted into Ago1 to direct translational repression. Meanwhile,  
298 the other arm as well as small-interfering RNA (siRNA) can be sorted into Ago 2 to direct  
299 transcriptional degradation (Czech et al 2009; Ghildiyal et al 2009; Okamura et al 2008, 2009;  
300 Yang et al 2011). Nevertheless, phylogenetic analyses suggested the two Ago forms in the  
301 two millipede genomes are lineage-specific, and did not share the duplication event that  
302 occurred in insects (Supplementary information S1, Figure S1.3.9). In addition, one Ago in *T.*  
303 *corallinus* (which we named Ago2) has become a pseudogene (Figure 5B). To test that this is  
304 not due to genome assembly error, nor due to single individual mutation, we have also carried

305 out PCR and Sanger sequencing on three other individuals, and confirmed this mutation  
306 (Figure 5C). Whether the duplicated Ago are functional in millipedes remains unclear.  
307 However, this unusual duplication of the small RNA machinery in millipedes reveals that the  
308 situation in insects was secondarily evolved, rather than shared with the duplication that  
309 occurred in the arthropod ancestor.

310

### 311 **MicroRNA regulate homeobox genes and arm switching**

312 To understand how posttranscriptional regulators have evolved in this special lineage,  
313 small RNA transcriptomes were obtained from the eggs, juveniles, and adults of *H. holstii*  
314 and *T. corallinus* (Supplementary information S1, Table 1.1.3-1.1.4). Using stringent criteria  
315 to annotate microRNAs which were supported by small RNA reads, a total of 59 and 58  
316 conserved microRNAs were identified in the genomes of *H. holstii* and *T. corallinus*  
317 respectively (Supplementary information S7-S9). This number is comparable to the 58  
318 microRNAs identified in the centipede *S. maritima* (Chipman et al 2014). In addition to the  
319 conserved microRNAs, 43 and 10 novel lineage-specific microRNAs could further be  
320 identified in millipedes *H. holstii* and *T. corallinus* respectively, and only one of them is  
321 conserved between the two millipedes (Supplementary information S1 Figure S1.3.13,  
322 Supplementary information S7-S9). Whether these novel microRNAs have contributed to the  
323 unique adaptation of millipedes deserves further explorations.

324

325 In the centipede *S. maritima*, a homologue of miR-125, which is a member of the  
326 ancient bilaterian miR-100/let-7/miR-125 cluster, could not be identified (Chipman et al  
327 2014; Griffiths-Jones et al 2011). However, miR-125, could be identified in both millipede  
328 genomes, suggesting a lineage-specific loss in the centipede (Figure 6A). In addition, our two  
329 high-quality millipede genomes allowed us to reveal conserved microRNA clusters, including  
330 miR-100-let-7-125, miR-263-96, miR-283-12, miR-275-305, miR-317-277-34, miR-71-13-2,  
331 miR-750-1175 and miR-993-10-iab4/8, as in most other arthropods (Supplementary  
332 information S9). Previously, miR-283 has been identified in pancrustaceans only, but it could  
333 be identified in the two millipede genomes presented here (Supplementary information S9).  
334 Moreover, miR-96 and miR-2001 could be identified in the two millipedes, but not in *S.*  
335 *maritima* (Supplementary information S9). These examples highlight the importance of  
336 having multiple high-quality myriapod genomes for comparison to properly understand the  
337 evolution of post-transcriptional regulators.

338

339 We further explored how conserved microRNAs may modulate gene regulatory  
340 networks among arthropod lineages. In insects, the bidirectionally transcribed microRNA *iab-*  
341 *4/iab-8* locus is renowned for its regulation of the functions of its flanking Hox genes in the  
342 genomic cluster (Hui et al 2013). In both millipedes *H. holstii* and *T. corallinus*, the  
343 microRNA *iab-4/iab-8* locus is located between Hox genes *abd-A* and *abd-B* similar to the  
344 situation in insects. In the cell-based dual-luciferase reporter assay to test Hox gene targets  
345 targeted by *iab-8* in the two millipedes, we found that the posterior Hox genes can be  
346 downregulated in the two millipedes (*abd-A* and *abd-B* by *H. holstii* *iab-8*, *abd-A*, *abd-B* and  
347 *Ubx* by *T. corallinus* *iab-8*) as in the situations in insects (Figure 6B). These data further  
348 established the regulation of Hox genes *Ubx* and *abd-A* by intergenic microRNA *iab-8* in the  
349 most recent common ancestor of insects and myriapods.

350

351 Many miRNA loci produce significant quantities of mature miRNAs from both arms  
352 with different amounts (5p or 3p), and RISC-loaded miRNA will then bind complementary to  
353 the 3'UTR of mRNA. These result in the suppression of gene expression by either, promoting  
354 mRNA cleavage, translational repression, or decay due to deadenylation (Ghildiyal and  
355 Zamore, 2009). In animals, complementary base pairing of nucleotides 2 to 8 in the 5' of the  
356 miRNA (also known as the seed region) is pivotal and efficient for targeting to mRNA (Krol  
357 et al 2010; Griffiths-Jones et al 2011). Since the sequences of alternative mature miRNAs  
358 derived from opposite complimentary arms are different, mature miRNAs derived from the  
359 same hairpin will also regulate distinct sets of genes (Marco et al 2010, 2012; Berezikov 2011;  
360 Griffiths-Jones et al 2011). Interestingly, the choice of dominant arm expression can be  
361 swapped at different situations, a termed known as microRNA arm switching, such as a-b)  
362 developmental stages, tissues (e.g. Ro et al 2007; Ruby et al 2007; Glazov et al 2008; Chiang  
363 et al 2010; Jagadeeswaran et al 2010; Cloonan et al 2011; Biryukova et al 2014; Gong et al  
364 2014; Pundhir and Goodkin 2015); c) pathological statuses (e.g. gastric cancer, Li et al 2012);  
365 and d) species (e.g. de Wit et al 2009; Marco et al 2010; Griffiths-Jones et al 2011; Brawand  
366 et al 2014; Sadd et al 2015). Comparing conserved microRNAs between the two millipedes  
367 and also all available insect genomes with small RNA sequencing data, we found multiple  
368 cases of microRNAs undergoing microRNA arm switching, including *let-7* and *miR-277*  
369 (Supplementary information S1 Figure S1.3.13, S1.3.15, Supplementary information S9).

370

371 To decipher how microRNA arm switching could potentially contribute to evolution  
372 between myriapods and insects, we focused on the two microRNAs iab-8 and miR-2788,  
373 which were previously only known from insects but are now also known to be conserved in  
374 centipede and millipedes (Chipman et al 2014; this study). Using the sensor assays, we found  
375 no obvious arm target repression preference of iab-8 of the two millipedes, but the  
376 *Drosophila* iab-8 have higher 5p dominant arm and target repression ability (Supplementary  
377 information S1 Figure S1.3.14). These data suggest that different arm usage of iab-8 has  
378 evolved between insects and myriapods. In the small RNA sequencing of the beetle  
379 *Tribolium castaneum* cell line and different developmental stages of millipedes *H. holstii*,  
380 miR-2788 shows different arm preferences (5p dominance in *T. castaneum* and 3p dominance  
381 in *H. holstii*) (Figure C-D). To test the targeting properties of *T. castaneum* and *H. holstii*  
382 miR-2788, a set of luciferase reporters containing perfect target sites for both 5p and 3p  
383 mature miR-2788 were constructed and co-transfected into S2 cells, with expression  
384 constructs driving production of either species' miR-2788. Repression of target sites for the  
385 5p and 3p arms of each hairpin was found to correlate with their relative production as  
386 determined by next-generation sequencing (Figure 6E-F). As sequence conservation outside  
387 microRNA hairpin sequences in the flanking sequences have been identified across species  
388 (Kenny et al 2015), and the dominant usage of arms of microRNA candidates such as miR-10  
389 in insects are not governed by thermodynamics (Griffiths-Jones et al 2011), microRNA  
390 flanking sequence has been suggested as a potential candidate to govern arm switching  
391 (Griffiths-Jones et al 2011; Kenny et al 2015). The flanking sequences of both *T. castaneum*  
392 and *H. holstii* miR-2788 were deleted and transfected to S2 cells for luciferase reporter assays,  
393 and our results revealed that the same dominant arm is associated with various flanking  
394 sequences (Figure 6E-F). This suggests that the governance of microRNA arm switching  
395 could be under multiple mechanisms, and candidate-specific during evolution, presenting an  
396 additional means of adaptation.

397

## 398 **Conclusions**

399 The two millipede chromosomal-level genomes provided in this study expand the  
400 gene repertoire of myriapods and arthropods. The phylogenetic position of myriapods within  
401 the arthropods provides a genetic toolkit for the reconstruction of evolutionary histories in  
402 insect and arthropod ancestors, as well as understanding their unique adaptations.

403

404

## 405 **Materials and Methods**

### 406 **Genome and transcriptome sequencing and assembly**

407 Genomic DNA was extracted from a single individual for each millipede, while mRNA and  
408 small RNA were extracted from a range of tissues. Different sequencing platforms were used  
409 to sequence genomic DNA, mRNA and small RNA. *De novo* genome and transcriptome  
410 assemblies were carried out following the methods described in the Supplementary  
411 information S1.

412

### 413 **Annotations and evolutionary analyses**

414 Gene model predictions were carried out with the support of mRNA. The identities, genomic  
415 locations, and expression of different gene families and small RNAs were analysed. Details  
416 are provided in the Supplementary information S1.

417

### 418 **Acknowledgements**

419 This work was supported by Hong Kong Research Grants Council (RGC) General Research  
420 Fund (GRF) (14103516, 14100919) and The Chinese University of Hong Kong (CUHK)  
421 Direct Grant (4053248) to JHLH. AH is supported by a Biotechnology and Biological  
422 Sciences Research Council (BBSRC) David Phillips Fellowship (BB/N020146/1). TB is  
423 supported by a studentship from the BBSRC-funded South West Biosciences Doctoral  
424 Training Partnership (BB/M009122/1). WLS, YL, CL are supported by studentships from  
425 The Chinese University of Hong Kong. The funders had no role in study design, data  
426 collection and analysis, decision to publish, or preparation of the manuscript. The authors  
427 would like to thank K. Chong, N. Kenny, C.Y. Lee, H.Y. Yip, and C. Yu for the initial works  
428 on millipede collections and/or materials extraction.

429

### 430 **Competing Interests**

431 None of the authors have any competing interests.

432

### 433 **Availability of data and materials**

434 The genomic and transcriptomic data generated in this study have been deposited to NCBI  
435 under BioProjects PRJNA564202 (*Helicorthomorpha holstii*) and PRJNA564195  
436 (*Trigoniulus corallinus*).

437

438 **References**

439 ADIS, J. Amazonian Arachnida and Myriapoda. Identification keys to all classes, orders,  
440 families, some genera, and lists of known terrestrial species. pp 555-576. (Sofia, Pensoft  
441 Publishers, 2002).

442 Arthur, W. & Chipman, A. D. The centipede *Strigamia maritima*: what it can tell us about the  
443 development and evolution of segmentation. *Bioessays* 27, 653-660 (2005).

444 Berezikov, E. Evolution of microRNA diversity and regulation in animals. *Nat Rev Genet* 12,  
445 846-860 (2011).

446 Biryukova, I., Ye, T. & Levashina, E. Transcriptome-wide analysis of microRNA expression  
447 in the malaria mosquito *Anopheles gambiae*. *BMC Genomics* 15, 557, doi:10.1186/1471-  
448 2164-15-557 (2014).

449 Brawand, D. et al. The genomic substrate for adaptive radiation in African cichlid fish.  
450 *Nature* 513, 375-381, doi:10.1038/nature13726 (2014).

451 Brooke, N. M., Garcia-Fernández, J. & Holland, P. W. H. The ParaHox gene cluster is an  
452 evolutionary sister of the Hox gene cluster. *Nature* 392, 920-922, doi:10.1038/31933 (1998).

453 Cao, J. Q. et al. in *Advances in Insect Physiology* Vol. 53, 55-85 (Academic Press, 2017).

454 Chénais, B., Caruso, A., Hiard, S. & Casse, N. The impact of transposable elements on  
455 eukaryotic genomes: From genome size increase to genetic adaptation to stressful  
456 environments. *Gene* 509, 7-15 (2012).

457 Chiang, H. R. et al. Mammalian microRNAs: experimental evaluation of novel and  
458 previously annotated genes. *Genes Dev* 24, 992-1009, doi:10.1101/gad.1884710 (2010).

459 Chipman, A. D. et al. The first myriapod genome sequence reveals conservative arthropod  
460 gene content and genome organisation in the centipede *Strigamia maritima*. *PLoS Biol* 12,  
461 e1002005 (2014).

462 Cloonan, N. et al. MicroRNAs and their isomiRs function cooperatively to target common  
463 biological pathways. *Genome Biol* 12, R126, doi:10.1186/gb-2011-12-12-r126 (2011).

464 Czech, B. et al. Hierarchical rules for argonaute loading in *Drosophila*. *Mol Cell* 36, 445-456  
465 (2009).

- 466 de Wit, E., Linsen, S. E. V., Cuppen, E. & Berezikov, E. Repertoire and evolution of miRNA  
467 genes in four divergent nematode species. *Genome Res* 19, 2064-2074 (2009).
- 468 Enghoff, H., Dohle, W. & Blower, J. G. Anamorphosis in millipedes (Diplopoda)—the  
469 present state of knowledge with some developmental and phylogenetic considerations.  
470 *Zoological Journal of the Linnean Society* 109, 103-234 (1993).
- 471 Feschotte, C. Transposable elements and the evolution of regulatory networks. *Nat Rev*  
472 *Genet* 9, 397-405, doi:10.1038/nrg2337 (2008).
- 473 Ghildiyal, M. & Zamore, P. D. Small silencing RNAs: an expanding universe. *Nat Rev Genet*  
474 10, 94-108, doi:10.1038/nrg2504 (2009).
- 475 Ghildiyal, M., Xu, J., Seitz, H., Weng, Z. & Zamore, P. D. Sorting of *Drosophila* small  
476 silencing RNAs partitions microRNA\* strands into the RNA interference pathway. *RNA* 16,  
477 43-56, doi:10.1261/rna.1972910 (2010).
- 478 Glazov, E. A. et al. A microRNA catalog of the developing chicken embryo identified by a  
479 deep sequencing approach. *Genome Res* 18, 957-964 (2008).
- 480 Gong, J. et al. Comprehensive analysis of human small RNA sequencing data provides  
481 insights into expression profiles and miRNA editing. *RNA Biol* 11, 1375-1385,  
482 doi:10.1080/15476286.2014.996465 (2014).
- 483 Griffiths-Jones, S., Hui, J. H. L., Marco, A. & Ronshaugen, M. MicroRNA evolution by arm  
484 switching. *EMBO Rep* 12, 172-177 (2011).
- 485 Grimson, A. et al. Early origins and evolution of microRNAs and Piwi-interacting RNAs in  
486 animals. *Nature* 455, 1193-1197, doi:10.1038/nature07415 (2008).
- 487 Hui, J. H. et al. Features of the ancestral bilaterian inferred from *Platynereis dumerilii*  
488 *ParaHox* genes. *BMC Biol* 7, 43, doi:10.1186/1741-7007-7-43 (2009).
- 489 Hui, J. H. L. et al. Structure, evolution and function of the bi-directionally transcribed *iab-*  
490 *4/iab-8* microRNA locus in arthropods. *Nucleic Acids Res* 41, 3352-3361,  
491 doi:10.1093/nar/gks1445 (2013).
- 492 Jagadeeswaran, G. et al. Deep sequencing of small RNA libraries reveals dynamic regulation  
493 of conserved and novel microRNAs and microRNA-stars during silkworm development.  
494 *BMC Genomics* 11, 52-69, doi:10.1186/1471-2164-11-52 (2010).

- 495 Kenning, M., Muller, C. H. G. & Sombke, A. The ultimate legs of Chilopoda (Myriapoda): a  
496 review on their morphological disparity and functional variability. PeerJ 5, e4023,  
497 doi:10.7717/peerj.4023 (2017).
- 498 Kenny, N. J. et al. The phylogenetic utility and functional constraint of microRNA flanking  
499 sequences. Proc Royal Soc B 282, 20142983 (2015).
- 500 Kidwell, M. G. & Lisch, D. R. Transposable elements and host genome evolution. Trends  
501 Ecol Evol 15, 95-99, doi:10.1016/s0169-5347(99)01817-0 (2000).
- 502 Krol, J., Loedige, I. & Filipowicz, W. The widespread regulation of microRNA biogenesis,  
503 function and decay. Nat Rev Genet 11, 597-610, doi:10.1038/nrg2843 (2010).
- 504 Li, Z. et al. MiR-196b directly targets both *HOXA9/MEIS1* oncogenes and FAS tumour  
505 suppressor in MLL-rearranged leukaemia. Nat Commun 3, 688-688,  
506 doi:10.1038/ncomms1681 (2012).
- 507 Marco, A., Hui, J. H., Ronshaugen, M. & Griffiths-Jones, S. Functional shifts in insect  
508 microRNA evolution. Genome Biol Evol 2, 686-696, doi:10.1093/gbe/evq053 (2010).
- 509 Marco, A., Hooks, K. & Griffiths-Jones, S. Evolution and function of the extended miR-2  
510 microRNA family. RNA Biol 9, 242-248, doi:10.4161/rna.19160 (2012).
- 511 Marek, P. E., Shear, W. A. & Bond, J. E. A redescription of the leggiest animal, the millipede  
512 Illacme plenipes, with notes on its natural history and biogeography  
513 (Diplopoda, Siphonophorida, Siphonorhinidae). Zookeys, 77-112, (2012).
- 514 Minelli, A. Treatise on Zoology. The Myriapoda. Vol. 2 (Brill ,2015).
- 515 Okamura, K. et al. The regulatory activity of microRNA\* species has substantial influence on  
516 microRNA and 3' UTR evolution. Nat Struct Mol Biol 15, 354-363 (2008).
- 517 Okamura, K., Liu, N. & Lai, E. C. Distinct Mechanisms for MicroRNA Strand Selection by  
518 *Drosophila* Argonautes. Mol Cell 36, 431-444 (2009).
- 519 Petersen, M. et al. Diversity and evolution of the transposable element repertoire in  
520 arthropods with particular reference to insects. BMC Evol Biol 19, 11, (2019).
- 521 Pisani, D. et al. in Arthropod biology and evolution: molecules, development, morphology  
522 (eds Alessandro Minelli, Geoffrey Boxshall, & Giuseppe Fusco) 41-61 (Springer Berlin  
523 Heidelberg, 2013).



- 524 Pundhir, S. & Gorodkin, J. Differential and coherent processing patterns from small RNAs.  
525 Sci Rep 5, 12062 (2015).
- 526 Qu, Z., Bendena, W. G., Tobe, S. S. & Hui, J. H. L. Juvenile hormone and sesquiterpenoids  
527 in arthropods: Biosynthesis, signaling, and role of MicroRNA. J Steroid Biochem Mol Biol  
528 184, 69-76 (2018).
- 529 Richards, S. Arthropod genome sequencing and assembly strategies. Methods Mol Bio  
530 (Clifton, N.J.) 1858, 1-14 (2019).
- 531 Ro, S., Park, C., Young, D., Sanders, K. M. & Yan, W. Tissue-dependent paired expression  
532 of miRNAs. Nucleic Acids Res 35, 5944-5953 (2007).
- 533 Ruby, J. G. et al. Evolution, biogenesis, expression, and target predictions of a substantially  
534 expanded set of *Drosophila* microRNAs. Genome Res 17, 1850-1864 (2007).
- 535 Sadd, B. M. et al. The genomes of two key bumblebee species with primitive eusocial  
536 organization. Genome Biol 16, 76, doi:10.1186/s13059-015-0623-3 (2015).
- 537 Schrader, L. & Schmitz, J. The impact of transposable elements in adaptive evolution. Mol  
538 Ecol 28, 1537-1549, doi:10.1111/mec.14794 (2019).
- 539 Yang, J. S. et al. Widespread regulatory activity of vertebrate microRNA\* species. RNA  
540 (New York, N.Y.) 17, 312-326, doi:10.1261/rna.2537911 (2011).

541

542

543

544 **Figure legends**

545 Table 1. Comparison of myriapod genome assembly quality.

546

547 Figure 1. A) Schematic diagram showing the phylogeny of myriapods, crustaceans, and  
548 insects; B) Life cycle of polydesmid millipede *Helicorthomorpha holstii*; C) Life cycle of  
549 rusty millipede *Trigoniulus corallinus*; D-F) Ozadene defensive gland of millipede *T.*  
550 *corallinus* and its proteomic analyses.

551

552 Figure 2. Synteny comparisons of myriapod and human genomes.

553

554 Figure 3. Hox and ParaHox gene cluster genomic organisations in millipedes and other  
555 arthropods.

556

557 Figure 4. Transposable element content, genomic locality, and estimates of accumulation  
558 history for sequenced members of the Myriapoda. Phylogenetic relationships among taxa are  
559 indicated on the left-hand side of the figure, alongside schematics of each myriapod species.  
560 From left to right: (i) Pie charts in proportion to assembled genome size illustrating the  
561 relative contribution to myriapod genomes from each major repeat class; (ii) Stacked bar  
562 charts illustrating the proportion of each repeat class found in genic ( $\leq 2\text{kb}$  from an annotated  
563 gene) versus intergenic regions ( $> 2\text{kb}$  from an annotated gene) for each myriapod species,  
564 expressed as a percentage of the total assembled genome; (iii) Repeat landscape plots  
565 illustrating transposable element accumulation history for each myriapod genome, based on  
566 Kimura distance-based copy divergence analyses, with sequence divergence (CpG adjusted  
567 Kimura substitution level) illustrated on the x-axis, percentage of the genome represented by  
568 each transposable element type on the y-axis, and transposon type indicated by the colour  
569 chart on the right-hand side.

570

571 Figure 5. A) Schematic diagram showing the biogenesis pathway of microRNAs (upper) and  
572 table summarising the number of gene copies contained in each millipede genome (lower); B)  
573 Schematic diagram showing the duplicates of Argonaute (Ago) gene in the two genomes.  
574 Conserved domains of AGO - ArgoN (red), ArgoL (blue), PAZ (green) and PIWI (orange).  
575 Inverted triangles, in TcoAGO2, indicate the position of multiple stop codons found in the  
576 corresponding gene sequence. Scale bar = 500 nucleotides; C) Confirmation of TcoAGO2  
577 pseudogene. PCR and Sanger sequencing were carried out on genomic DNA collected from  
578 three *Trigoniulus corallinus* individuals that are not used for genome sequencing.

579

580

581 Figure 6. A) Genomic organisation of miR-100/let-7/miR-125 clusters in various animals; B)  
582 Luciferase assays showing the repression activities of Hox genes by miR-iab-8 in both  
583 millipedes; D-E) Small RNA read counts of miR-2788 in different developmental stages in  
584 millipede *Helicorthomorpha holstii* and in TcA cell line of beetle *Tribolium castaneum*;  
585 Abbreviations: S1-S7: Stadium 1-7, J17: Juvenile, FA: adult female, MA: adult male, TcA:  
586 TcA cell line; I-J) Luciferase activity showing the differential arm target (i.e. miR-2788-5p

587 and -3p sensor) repression ability between miR-2788 carrying different flanking sequence of  
588 *H. holstii* and *T. castaneum*.  
589  
590 Supplementary Information:  
591 S1. Supplementary methodology and data.  
592 S2. Transposable elements in the two millipede genomes.  
593 S3. List of toxin-like proteins predicted in the myriapod genomes.  
594 S4. List of proteins identified in the *Trigoniulus corallinus* ozadene gland.  
595 S5. Homeobox gene sequences annotated in the two millipede genomes.  
596 S6. Homeobox gene tree.  
597 S7. *Helicorthomorpha holstii* microRNA structures.  
598 S8. *Trigoniulus corallinus* microRNA structures.  
599 S9. The microRNA contents and arm usage in *Tribolium castaneum* and *Helicorthomorpha*  
600 *holstii*.

|                     |                           |                                 |                               |
|---------------------|---------------------------|---------------------------------|-------------------------------|
| Common name         | Coastal Centipede         | Polydesmidan Millipede          | Rusty Millipede               |
| Species name        | <i>Strigamia maritima</i> | <i>Helicorthomorpha holstii</i> | <i>Trigoniulus corallinus</i> |
| Accession number    | GCA_000239455.1           | SAMN12705546                    | SAMN12704943                  |
| Assembly size       | 176,210,797               | 181,201,347                     | 448,558,750                   |
| Scaffold N50        | 139,451                   | 18,119,263                      | 26,787,286                    |
| Number of scaffolds | 14,739                    | 7,137                           | 9,127                         |
| Contig N50          | 24,745                    | 335,075                         | 184,856                       |
| Number of contigs   | 24,080                    | 16,022                          | 27,543                        |
| Gap content (N)     | 1.48%                     | 1.95%                           | 1.42%                         |
| Number of genes     | 15,008                    | 23,013                          | 21,361                        |
| Complete BUSCOs     | 96.7%                     | 97.7%                           | 97.2%                         |
| Reference           | Chipman et al 2014        | This study                      | This study                    |

**Table 1**  
Table 1

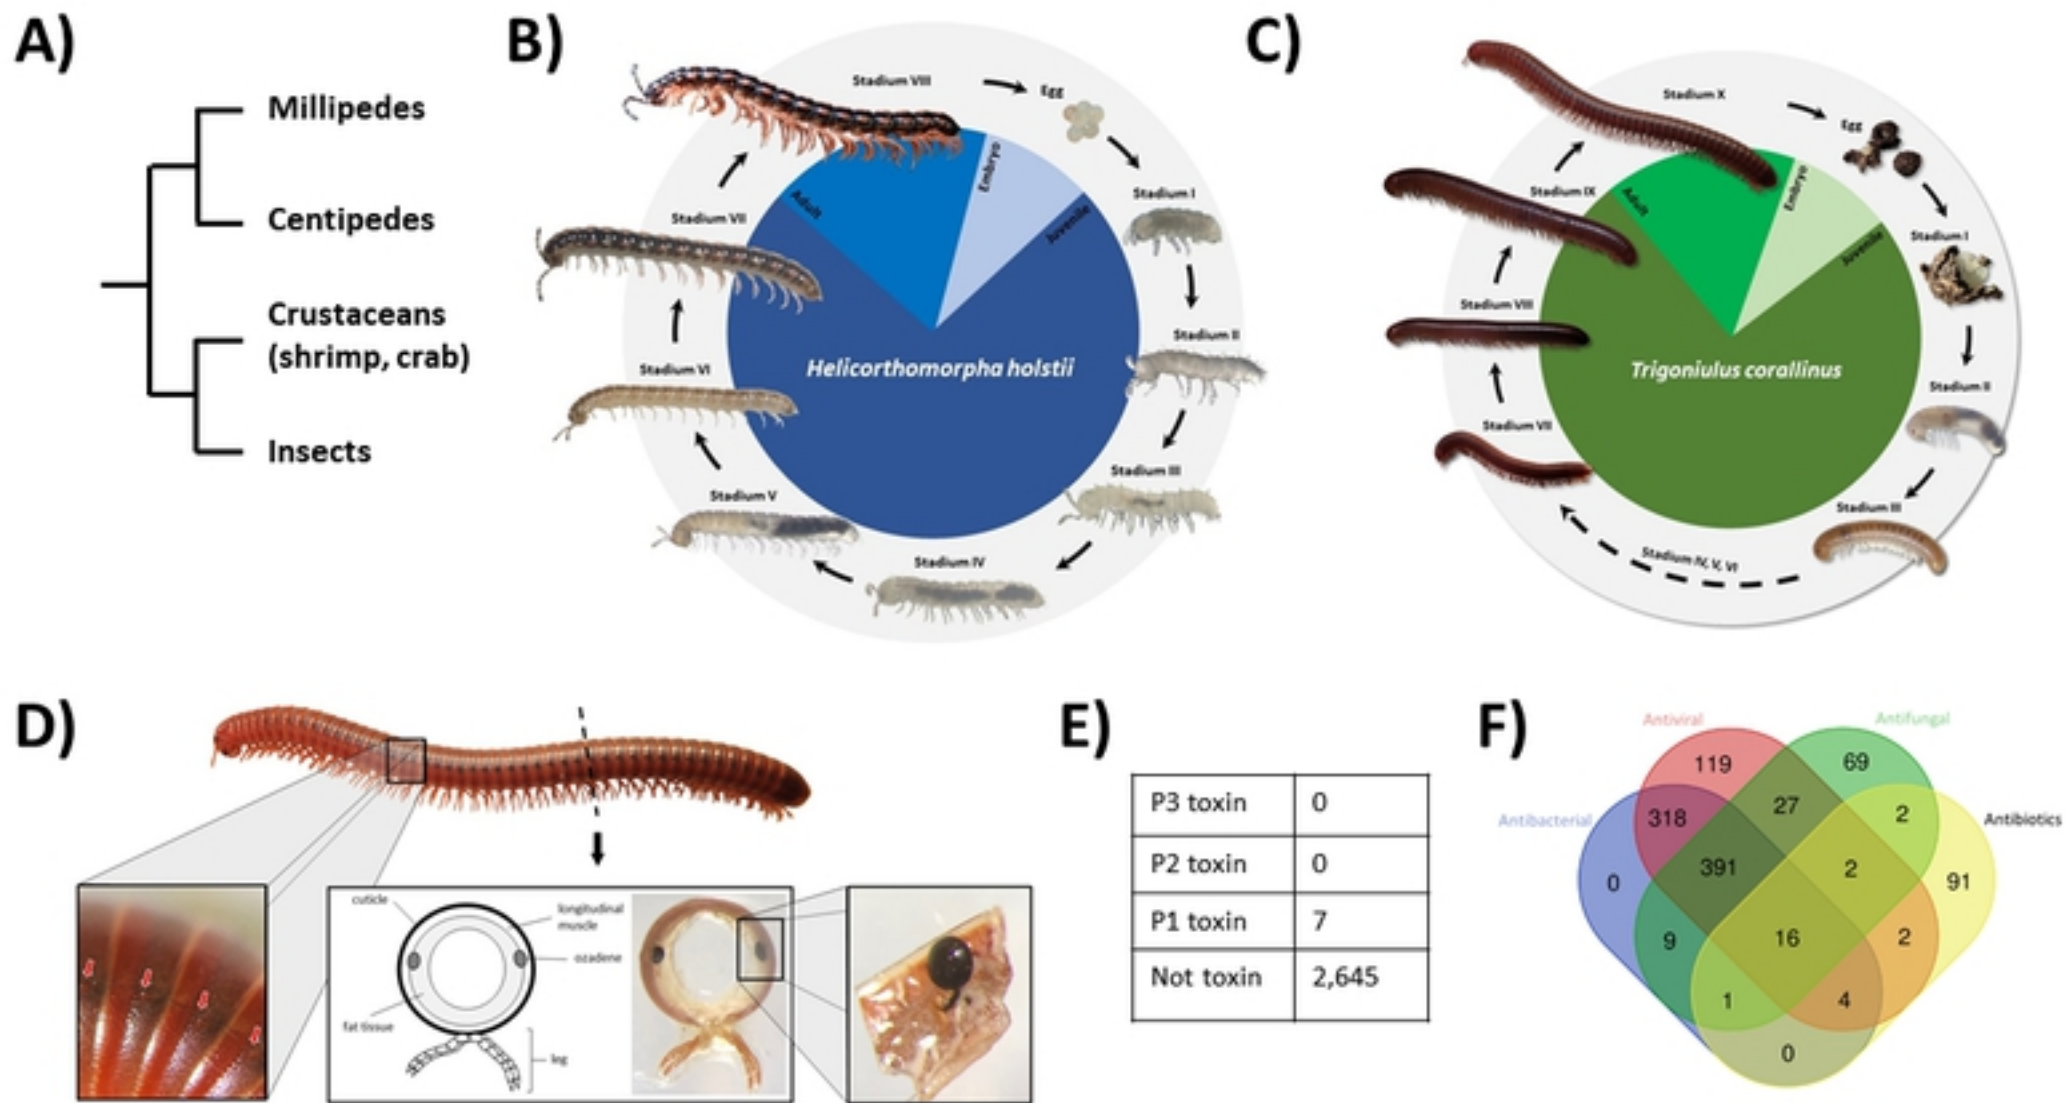

**Fig 1**  
Figure 1

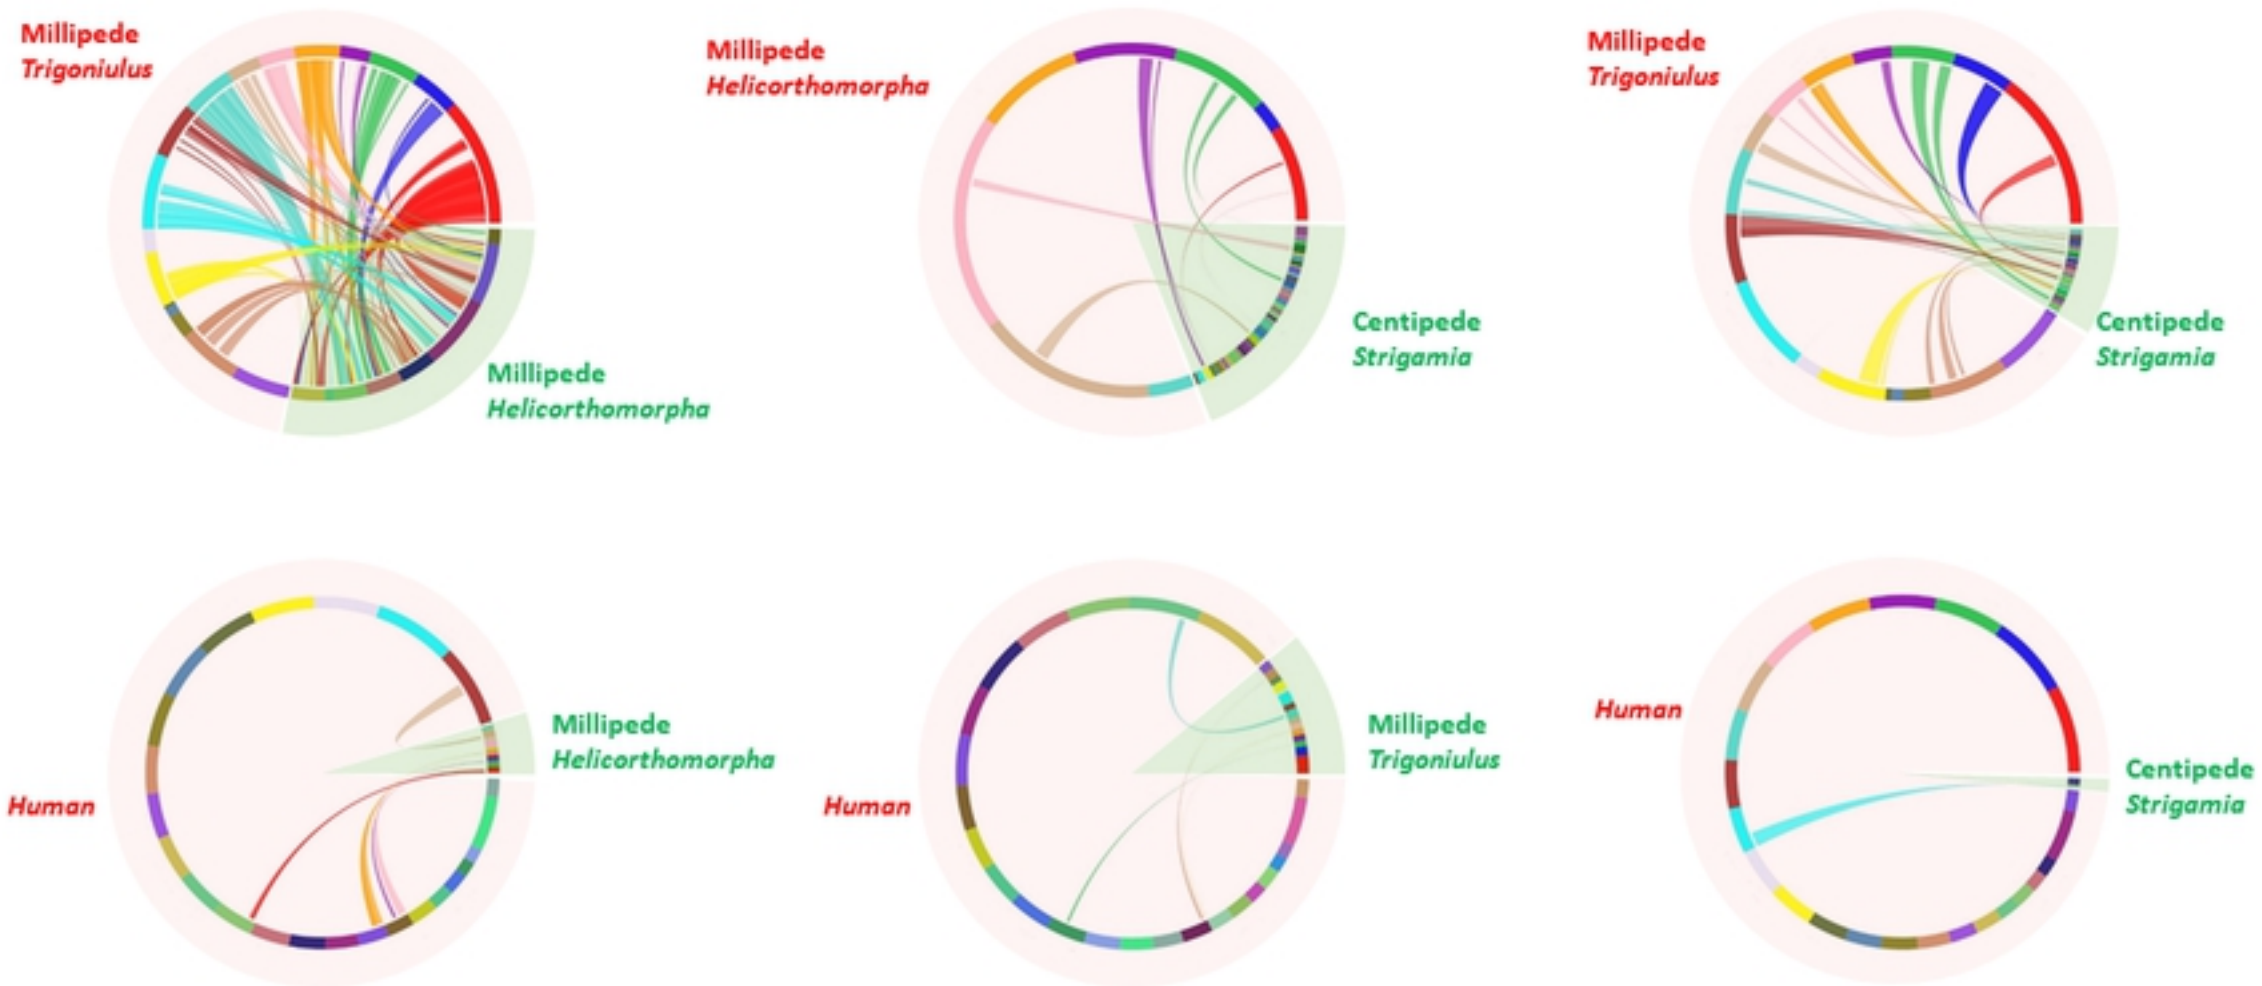

**Fig 2**  
Figure 1

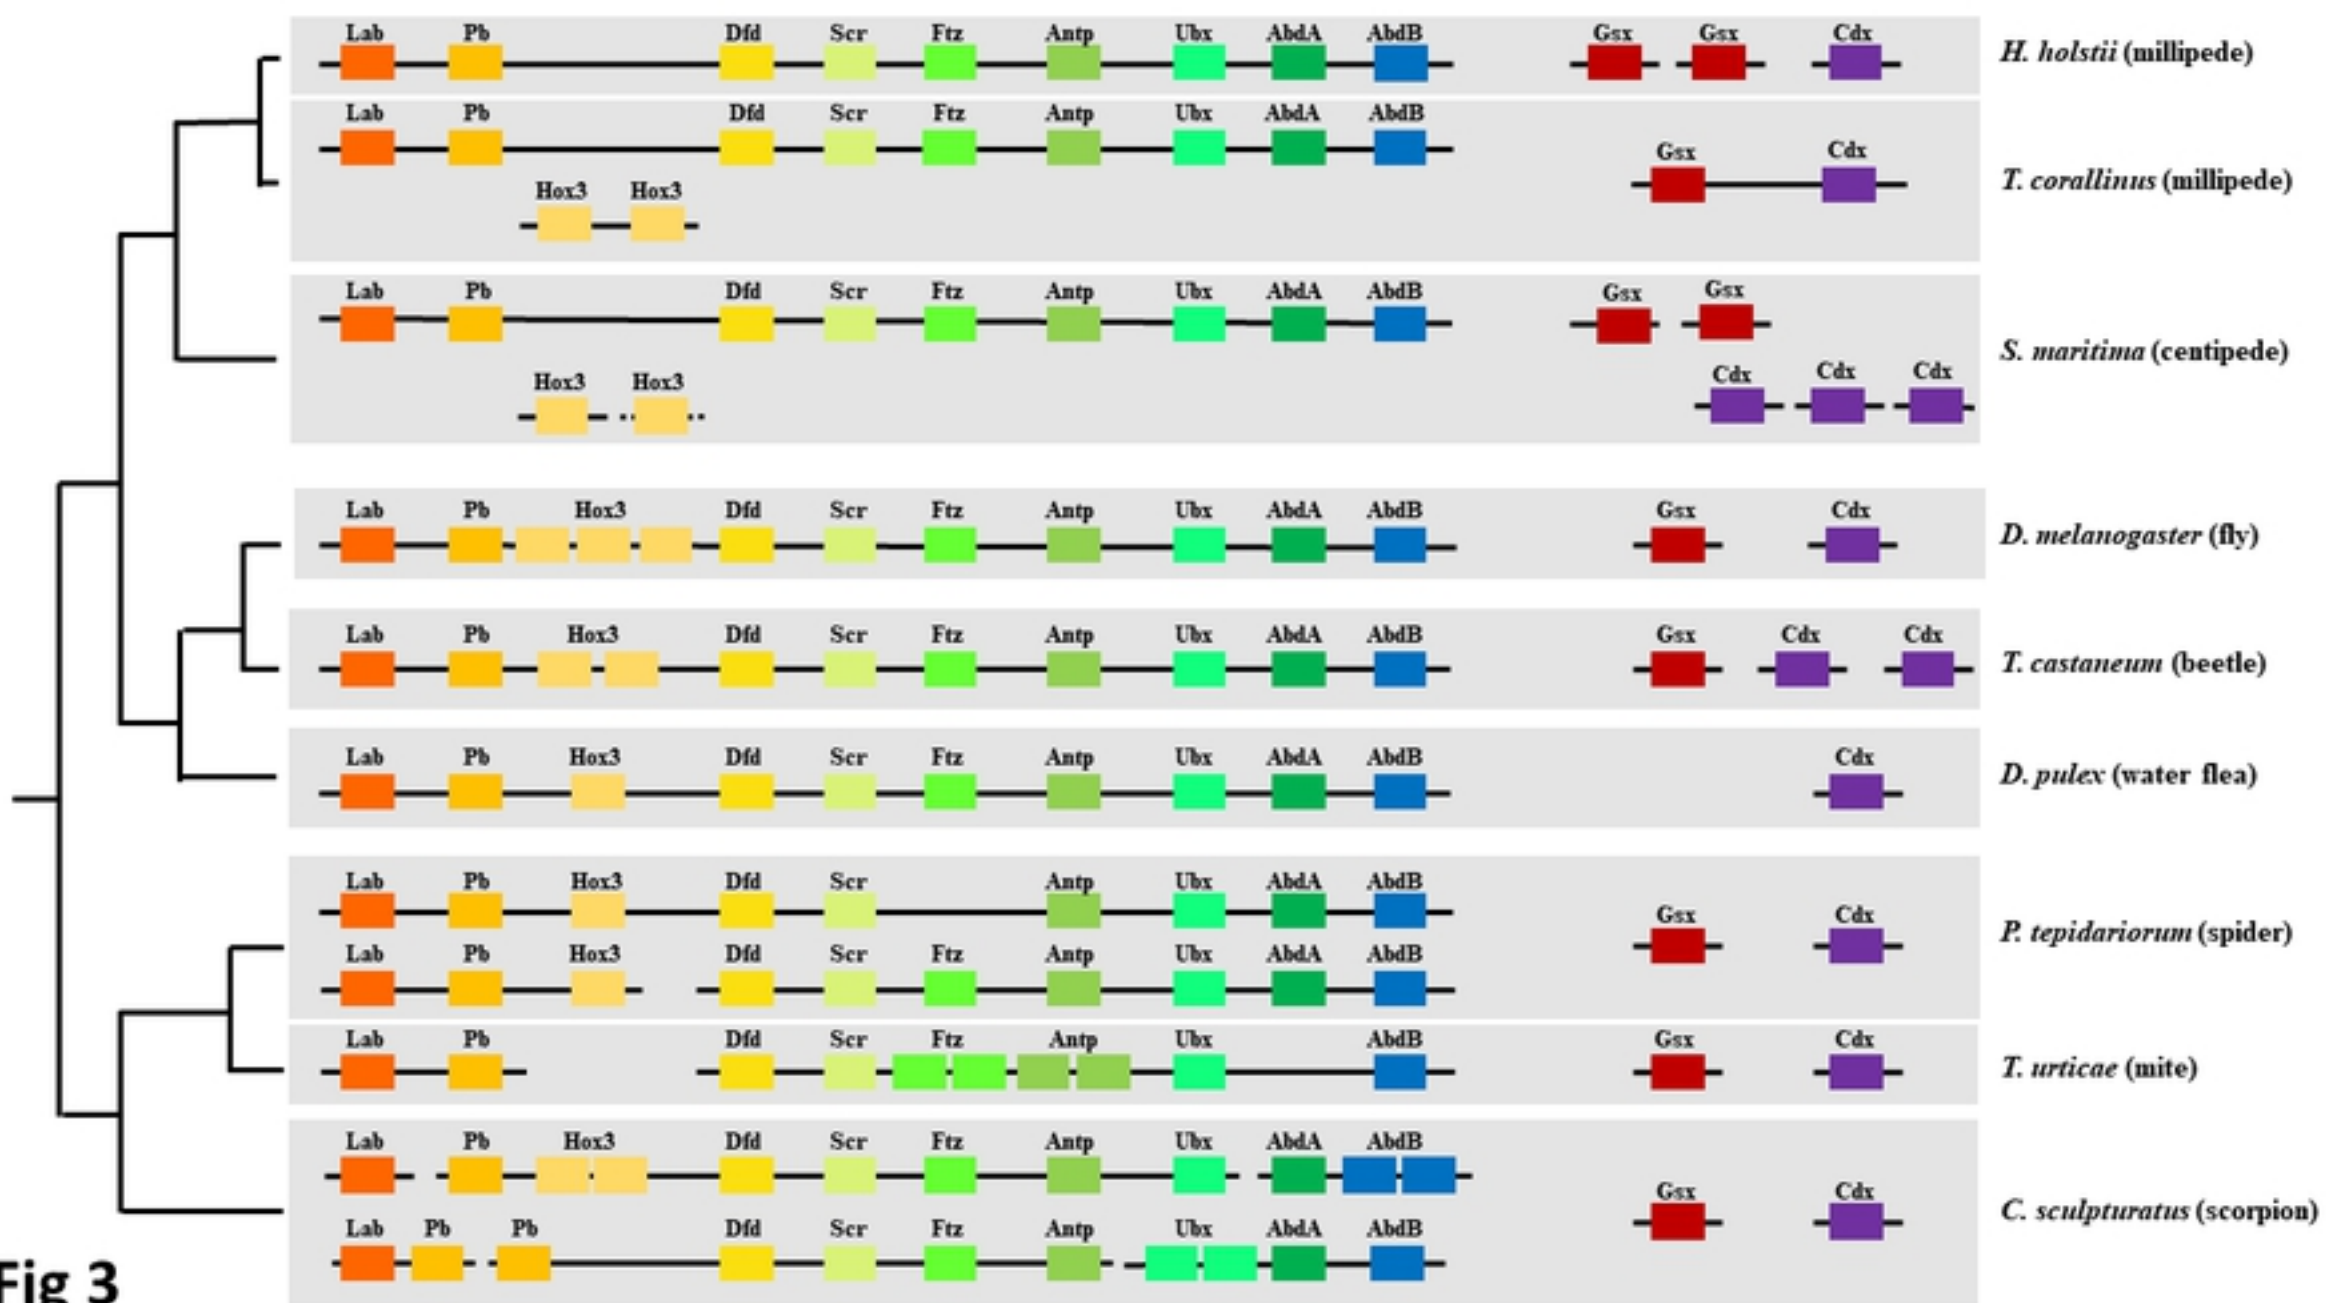

Fig 3

Figure 3

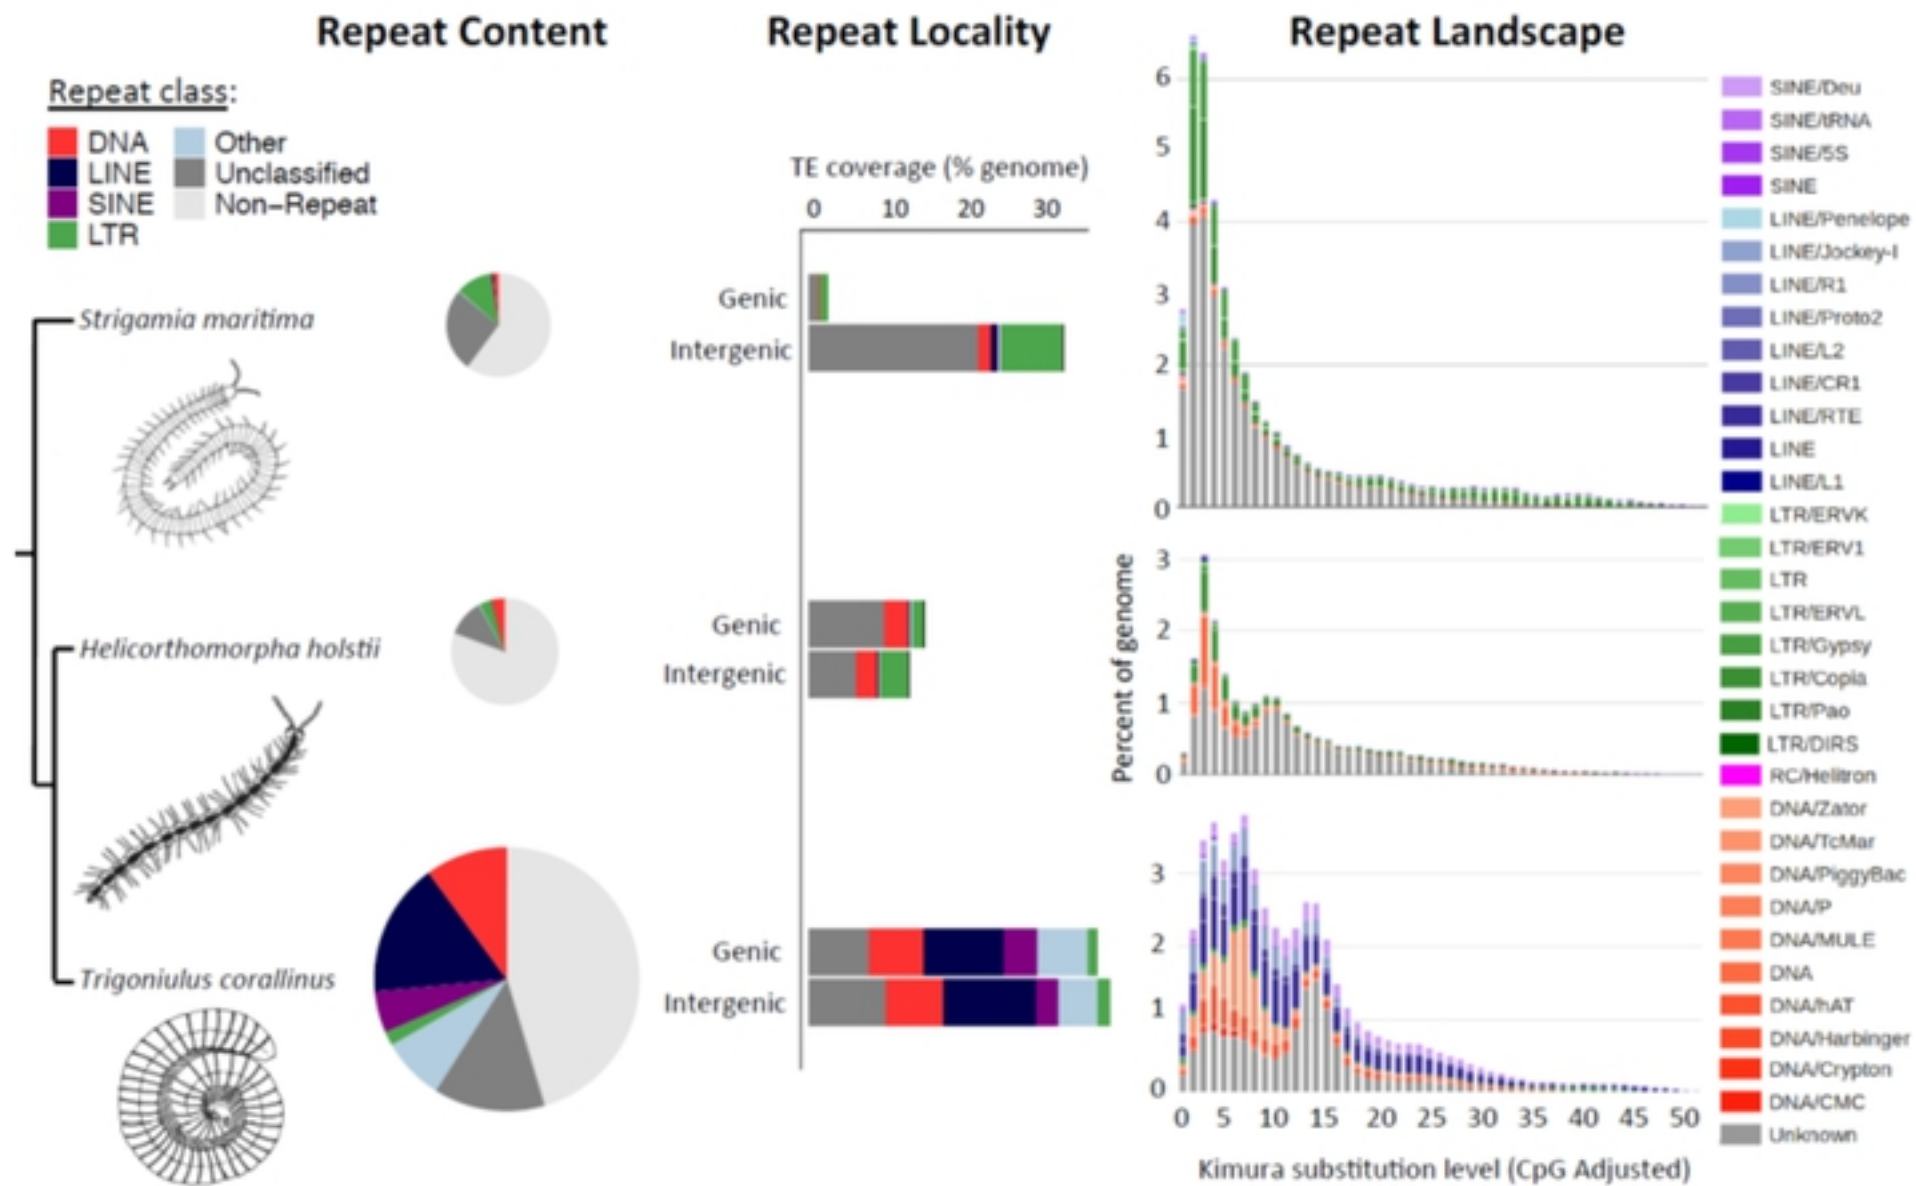

**Fig 4**  
Figure 4





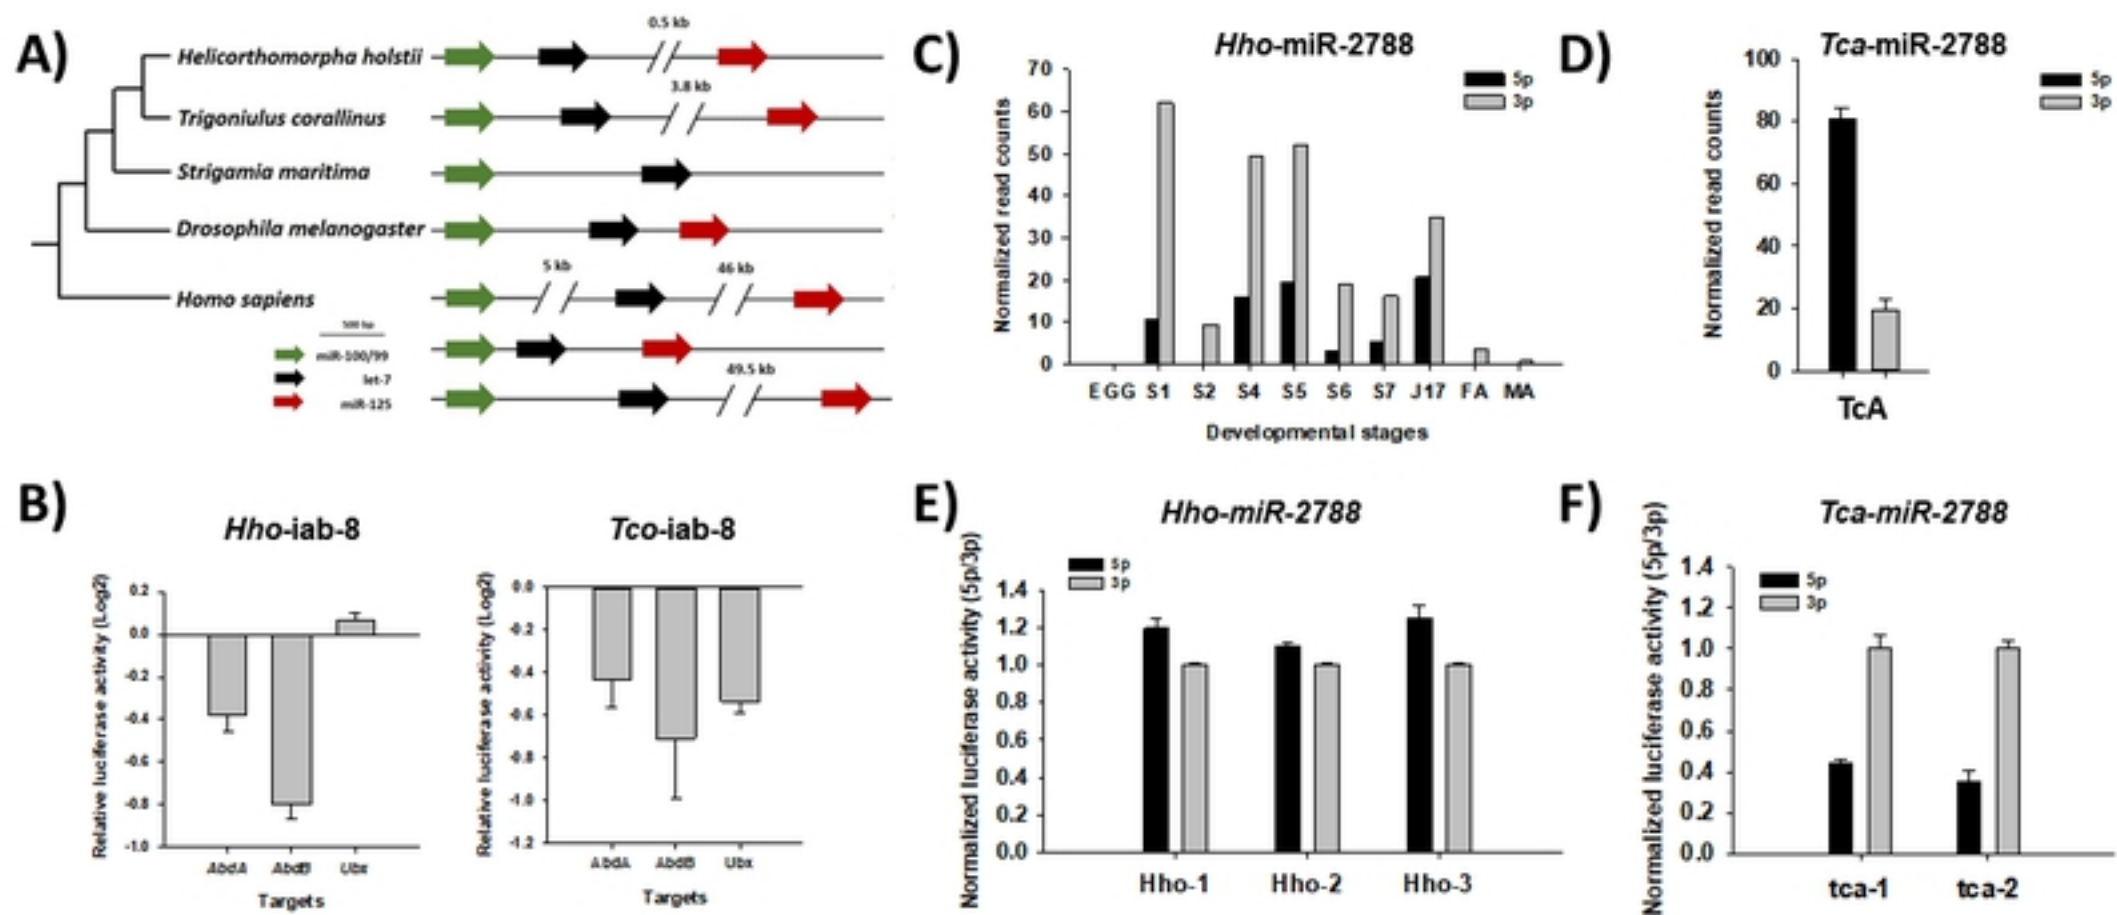

**Fig 6**

Figure 6
